# Supplementary material for: Parkin Mediates Apparent E2-Independent Monoubiquitination In Vitro and Contains an Intrinsic Activity That Catalyzes Polyubiquitination
Source: PubMed Central journal article supplement (PMC3100294; doi:10.1371/journal.pone.0019720), 2011-05-23

Supplemental Fig. S3 Chew, Matsuda et al

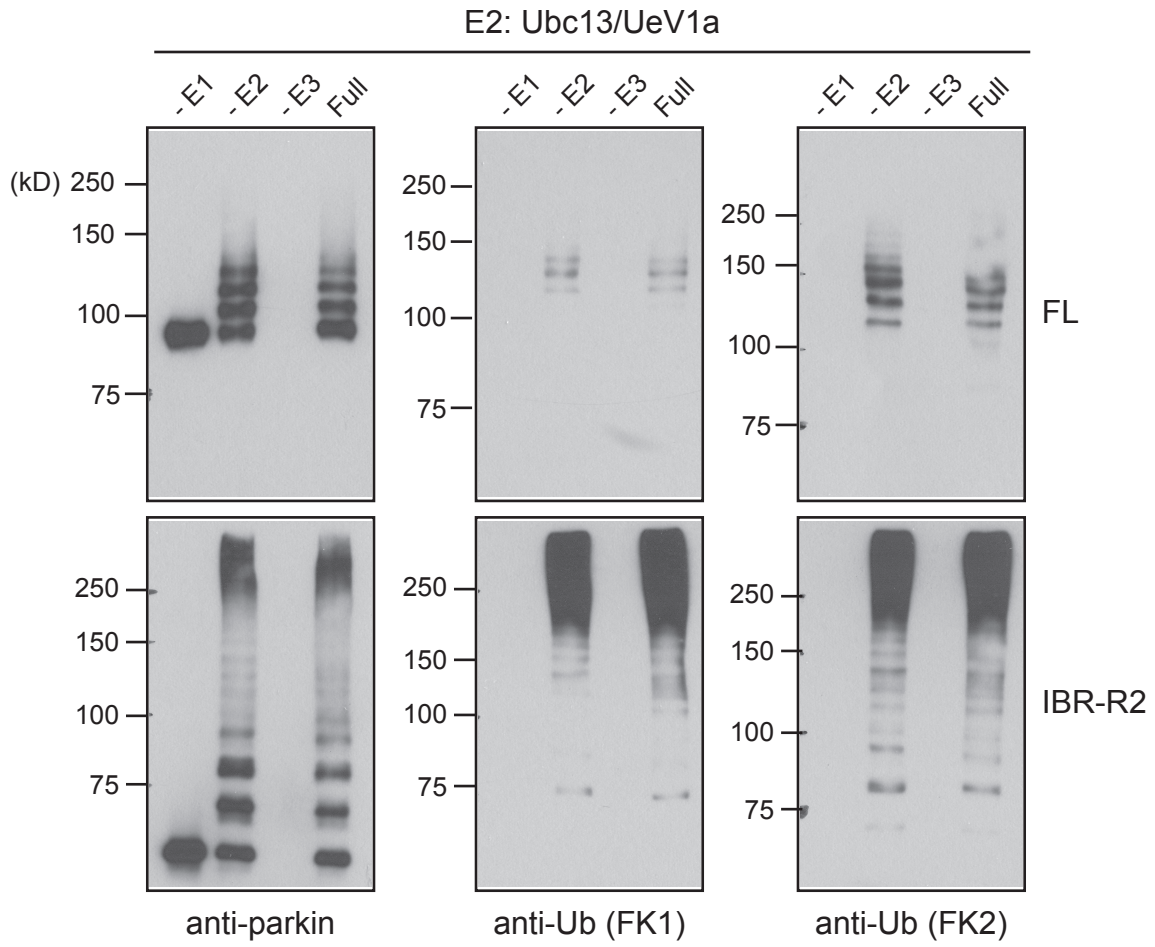

Supplement: pone.0019720.s003.pdf [file pone.0019720.s003.pdf]
